# Supplementary material for: Evidence for an effect of receptor density on ligand occupancy and agonist EC50
Source: PubMed Central journal article supplement (PMC6910986; doi:10.1038/s41598-019-55361-x), 2019-12-13
Supplement: 41598_2019_55361_MOESM1_ESM.pdf [file 41598_2019_55361_MOESM1_ESM.pdf]

SupplementaryTable1.xlsx

| Oocyte ID# | Oocyte Code | RNA injection date/time | RNA injection conc ( $\mu\text{g}/\mu\text{l}$ ) | RNA injection dose (ng) | Electrophysiology Experiment start time | Number of measurements per oocyte | $I_{max}$ | $pEC_{50}$ | $n_H$     | alpha ( $\alpha$ ) | gamma ( $\gamma$ ) | ELS       | Comments                  |
|------------|-------------|-------------------------|--------------------------------------------------|-------------------------|-----------------------------------------|-----------------------------------|-----------|------------|-----------|--------------------|--------------------|-----------|---------------------------|
| 1          | 42537c1     | 14/06/2016 16:00        | 0.5                                              | 25                      | 16/06/2016 10:01                        | 15                                | 6.4036394 | 5.7552687  | 3.6463815 | 0.0830413          | 0.5724845          | -58.90496 |                           |
| 2          | 42537c2     | 14/06/2016 16:00        | 0.5                                              | 25                      | 16/06/2016 10:21                        | 14                                | 6.5904024 | 5.729241   | 3.5801981 | 0.0710765          | 0.8109716          | -60.90685 |                           |
| 3          | 42537c3     | 14/06/2016 16:00        | 0.5                                              | 25                      | 16/06/2016 10:41                        | 14                                | 7.8801436 | 5.797709   | 3.8213889 | 0.2492967          | 0.7778165          | -22.5827  |                           |
| 4          | 42537c4     | 14/06/2016 16:00        | 0.5                                              | 25                      | 16/06/2016 11:01                        | 14                                | 6.5394076 | 5.791984   | 3.7384221 | 0.1040882          | 0.6738948          | -49.03525 |                           |
| 5          | 42537c5     | 14/06/2016 16:00        | 0.5                                              | 25                      | 16/06/2016 11:21                        | 14                                | 6.5502006 | 5.8225126  | 3.6436289 | 0.111554           | 0.8464833          | -45.3967  |                           |
| 6          | 42538c1     | 14/06/2016 16:00        | 0.5                                              | 25                      | 17/06/2016 10:01                        | 14                                | 7.7759769 | 5.7038462  | 3.8605259 | 0.147716           | 0.7627217          | -42.49362 |                           |
| 7          | 42538c2     | 14/06/2016 16:00        | 0.5                                              | 25                      | 17/06/2016 10:21                        | 14                                | 7.287489  | 5.6899252  | 3.7811307 | 0.075364           | 0.5971843          | -61.3476  |                           |
| 8          | 42538c3     | 14/06/2016 16:00        | 0.5                                              | 25                      | 17/06/2016 10:41                        | 14                                | 8.2282412 | 5.8021157  | 3.8693963 | 0.0457028          | 0.5461037          | -71.28684 |                           |
| 9          | 42538c4     | 14/06/2016 16:00        | 0.5                                              | 25                      | 17/06/2016 11:01                        | 14                                | 7.2341013 | 5.7059162  | 3.8025813 | 0.064788           | 0.2581005          | -63.7402  |                           |
| 10         | 42538c5     | 14/06/2016 16:00        | 0.5                                              | 25                      | 17/06/2016 11:21                        | 14                                | 7.2570159 | 5.7277671  | 3.8314603 | 0.0797543          | 0.6571571          | -57.33033 |                           |
| 11         | 42538c6     | 14/06/2016 16:00        | 0.5                                              | 25                      | 17/06/2016 11:41                        | 14                                | 7.8859276 | 5.7889356  | 3.7422348 | 0.0347845          | 0.4004182          | -79.39904 |                           |
| 12         | 42538c7     | 14/06/2016 16:00        | 0.5                                              | 25                      | 17/06/2016 12:01                        | 14                                | 7.4940137 | 5.77055    | 3.8505967 | 0.0573984          | 1.0701374          | -66.78389 |                           |
| 13         | 42538c8     | 14/06/2016 16:00        | 0.5                                              | 25                      | 17/06/2016 12:21                        | 15                                | 7.7913584 | 5.8148948  | 4.2250002 | 0.2185956          | 0.7253056          | -30.74229 |                           |
| 14         | 42538c9     | 14/06/2016 16:00        | 0.5                                              | 25                      | 17/06/2016 14:01                        | 15                                | 7.4802079 | 5.8244045  | 3.6437929 | 0.0914049          | 0.9104113          | -52.14119 |                           |
| 15         | 42538c10    | 14/06/2016 16:00        | 0.5                                              | 25                      | 17/06/2016 14:21                        | 14                                | 7.948145  | 5.8733009  | 3.7047257 | 0.083878           | 0.7273227          | -51.30781 |                           |
| 16         | 42642c1     | 27/09/2016 15:40        | 0.095                                            | 4.75                    | 29/09/2016 10:01                        | 7                                 | 7.5166717 | 5.9315394  | 4.4894511 | 0.040487           | 2                  | -34.16669 | $\gamma$ constrained to 2 |
| 17         | 42642c2     | 27/09/2016 15:45        | 0.287                                            | 14.35                   | 29/09/2016 10:11                        | 7                                 | 8.6256968 | 6.0011184  | 3.8434234 | 0.0373312          | 2                  | -28.08762 | $\gamma$ constrained to 2 |
| 18         | 42642c3     | 27/09/2016 15:45        | 0.287                                            | 14.35                   | 29/09/2016 10:24                        | 5                                 | 8.3315558 | 5.9981479  | 4.0104897 | 0.0200931          | 2                  | -14.4256  | $\gamma$ constrained to 2 |
| 19         | 42642c4     | 27/09/2016 15:45        | 0.287                                            | 14.35                   | 29/09/2016 10:38                        | 7                                 | 8.2738087 | 5.9874688  | 3.4868632 | 0.0214533          | 2                  | -35.19664 | $\gamma$ constrained to 2 |
| 20         | 42642c5     | 27/09/2016 15:40        | 0.095                                            | 4.75                    | 29/09/2016 10:50                        | 7                                 | 6.6074247 | 5.8285884  | 3.9474    | 0.1137881          | 0.838609           | -23.02213 |                           |
| 21         | 42642c6     | 27/09/2016 15:40        | 0.095                                            | 4.75                    | 29/09/2016 11:50                        | 7                                 | 8.9849402 | 5.8633407  | 3.6744709 | 0.0612865          | 1.226318           | -27.14176 |                           |
| 22         | 42641c1     | 27/09/2016 15:45        | 0.287                                            | 14.35                   | 28/09/2016 10:15                        | 10                                | 5.3981721 | 5.7277339  | 3.8293932 | 0.1749042          | 1.0589758          | -22.35079 |                           |
| 23         | 42641c2     | 27/09/2016 15:40        | 0.095                                            | 4.75                    | 28/09/2016 13:00                        | 8                                 | 4.8303795 | 5.7363616  | 4.7444884 | 0.2929848          | 1.3154948          | -17.89105 |                           |
| 24         | 42641c3     | 27/09/2016 15:40        | 0.095                                            | 4.75                    | 28/09/2016 13:29                        | 6                                 | 6.0685534 | 5.7620067  | 3.9295556 | 0.0412357          | 2                  | -16.2962  | $\gamma$ constrained to 2 |
| 25         | 42641c4     | 27/09/2016 15:45        | 0.287                                            | 14.35                   | 28/09/2016 13:40                        | 7                                 | 5.9577646 | 5.7944492  | 3.9151293 | 0.0364535          | 0.5657096          | -39.82879 |                           |
| 26         | 42641c5     | 27/09/2016 15:40        | 0.095                                            | 4.75                    | 28/09/2016 14:10                        | 8                                 | 5.6319641 | 5.7772127  | 3.8194192 | 0.041397           | 2                  | -42.05214 | $\gamma$ constrained to 2 |
| 27         | 42641c7     | 27/09/2016 15:40        | 0.095                                            | 4.75                    | 28/09/2016 14:25                        | 7                                 | 5.3435187 | 5.7921366  | 3.8932863 | 0.042376           | 0.7652876          | -38.45284 |                           |
| 28         | 42641c8     | 27/09/2016 15:45        | 0.287                                            | 14.35                   | 28/09/2016 14:36                        | 7                                 | 6.8866156 | 5.7796054  | 4.3552784 | 0.0115223          | 0.8534067          | -56.76486 |                           |
| 29         | 42641c9     | 27/09/2016 15:40        | 0.095                                            | 4.75                    | 28/09/2016 14:50                        | 7                                 | 5.13484   | 5.7286882  | 3.6660611 | 0.0570555          | 0.9944589          | -35.51214 |                           |
| 30         | 42641c10    | 27/09/2016 15:40        | 0.095                                            | 4.75                    | 28/09/2016 15:43                        | 7                                 | 4.8322007 | 5.7292112  | 3.9205218 | 0.1087003          | 0.66532            | -26.53293 |                           |
| 31         | 42643c2     | 27/09/2016 15:40        | 0.095                                            | 4.75                    | 30/09/2016 12:28                        | 9                                 | 12.110336 | 6.0595821  | 3.9236265 | 0.2623771          | 1.5961397          | -0.39072  |                           |
| 32         | 42643c3     | 27/09/2016 15:40        | 0.095                                            | 4.75                    | 30/09/2016 12:50                        | 7                                 | 5.9832941 | 5.8076646  | 3.4250202 | 0.042384           | 1.2532381          | -36.08994 |                           |
| 33         | 42643c4     | 27/09/2016 15:45        | 0.287                                            | 14.35                   | 30/09/2016 13:04                        | 7                                 | 8.9845161 | 5.979136   | 4.3376756 | 0.0422189          | 0.8190879          | -33.78733 |                           |
| 34         | 42643c5     | 27/09/2016 15:40        | 0.095                                            | 4.75                    | 30/09/2016 13:32                        | 7                                 | 9.1879858 | 6.0240306  | 3.9685832 | 0.0125395          | 2                  | -42.39273 | $\gamma$ constrained to 2 |
| 35         | 42643c6     | 27/09/2016 15:45        | 0.287                                            | 14.35                   | 30/09/2016 13:46                        | 7                                 | 9.9706182 | 6.1164219  | 3.9041631 | 0.0198982          | 2                  | -32.19982 | $\gamma$ constrained to 2 |
| 36         | 42643c7     | 27/09/2016 15:40        | 0.095                                            | 4.75                    | 30/09/2016 14:04                        | 7                                 | 9.927546  | 6.0160669  | 3.3177023 | 0.0104638          | 2                  | -41.27162 | $\gamma$ constrained to 2 |
| 37         | 42643c8     | 27/09/2016 15:45        | 0.287                                            | 14.35                   | 30/09/2016 14:34                        | 7                                 | 10.095817 | 6.0519091  | 5.3401473 | 0.1431535          | 0.8891349          | -16.57992 |                           |
| 38         | 42646c1     | 27/09/2016 15:40        | 0.095                                            | 4.75                    | 03/10/2016 09:34                        | 8                                 | 9.7731034 | 6.0807268  | 4.5210511 | 0.107094           | 2                  | -11.17754 | $\gamma$ constrained to 2 |
| 39         | 42646c2     | 27/09/2016 15:45        | 0.287                                            | 14.35                   | 03/10/2016 09:53                        | 9                                 | 10.030095 | 6.1551424  | 3.5435229 | 0.103699           | 1.0778043          | -20.71363 |                           |
| 40         | 42646c3     | 27/09/2016 15:45        | 0.287                                            | 14.35                   | 03/10/2016 10:19                        | 8                                 | 9.4081875 | 6.1564706  | 4.1662901 | 0.1094076          | 1.4671336          | -18.48626 | data shown in Fig 1B      |
| 41         | 42646c4     | 27/09/2016 15:40        | 0.095                                            | 4.75                    | 03/10/2016 10:35                        | 8                                 | 11.040834 | 6.0385972  | 4.9822414 | 0.0399905          | 1.6758214          | -39.98268 |                           |
| 42         | 42646c5     | 27/09/2016 15:45        | 0.287                                            | 14.35                   | 03/10/2016 10:53                        | 8                                 | 9.5563948 | 6.0979592  | 4.0117321 | 0.032228           | 2                  | -28.24955 | $\gamma$ constrained to 2 |
| 43         | 42646c6     | 27/09/2016 15:40        | 0.095                                            | 4.75                    | 03/10/2016 11:15                        | 8                                 | 11.886465 | 6.057187   | 4.4035157 | 0.0552453          | 1.31291            | -31.72779 |                           |
| 44         | 42647c1     | 27/09/2016 15:45        | 0.287                                            | 14.35                   | 04/10/2016 09:46                        | 7                                 | 9.1125781 | 6.0959125  | 4.7633585 | 0.0154472          | 2                  | -40.91033 | $\gamma$ constrained to 2 |
| 45         | 42647c2     | 27/09/2016 15:40        | 0.095                                            | 4.75                    | 04/10/2016 10:15                        | 7                                 | 9.4445988 | 6.0533377  | 5.8947266 | 0.0848374          | 2                  | -22.60875 | $\gamma$ constrained to 2 |

SupplementaryTable1.xlsx

| Oocyte ID# | Oocyte Code | RNA injection date/time | RNA injection conc ( $\mu\text{g}/\mu\text{l}$ ) | RNA injection dose (ng) | Electrophysiology Experiment start time | Number of measurements per oocyte | $I_{max}$ | $pEC_{50}$ | $n_H$     | alpha ( $\alpha$ ) | gamma ( $\gamma$ ) | ELS       | Comments                                        |
|------------|-------------|-------------------------|--------------------------------------------------|-------------------------|-----------------------------------------|-----------------------------------|-----------|------------|-----------|--------------------|--------------------|-----------|-------------------------------------------------|
| 46         | 42647c3     | 27/09/2016 15:40        | 0.095                                            | 4.75                    | 04/10/2016 10:15                        | 7                                 | 9.3294345 | 6.0864123  | 4.8131517 | 0.1576897          | 1.0188077          | -13.59779 |                                                 |
| 47         | 42647c4     | 27/09/2016 15:45        | 0.287                                            | 14.35                   | 04/10/2016 10:38                        | 8                                 | 8.5869891 | 6.130822   | 5.5739143 | 0.0428349          | 2                  | -30.66483 | $\gamma$ constrained to 2                       |
| 48         | 42648c1     | 05/10/2016 10:20        | 0.287                                            | 14.35                   | 05/10/2016 15:12                        | 1                                 |           |            |           |                    |                    |           | no response to 5-HT                             |
| 49         | 42648c2     | 05/10/2016 10:20        | 0.287                                            | 14.35                   | 05/10/2016 15:16                        | 2                                 |           |            |           |                    |                    |           | no response to 5-HT                             |
| 50         | 42648c3     | 05/10/2016 10:00        | 0.0316                                           | 1.58                    | 05/10/2016 15:24                        | 1                                 |           |            |           |                    |                    |           | no response to 5-HT                             |
| 51         | 42648c4     | 05/10/2016 10:10        | 0.095                                            | 4.75                    | 05/10/2016 15:27                        | 6                                 | 0.1459642 | 5.439216   | 2.7429837 | 0.0433772          | 2                  | -68.53119 | $\gamma$ constrained to 2; data shown in Fig 1B |
| 52         | 42648c5     | 05/10/2016 10:10        | 0.095                                            | 4.75                    | 05/10/2016 15:30                        | 1                                 |           |            |           |                    |                    |           | no response to 5-HT                             |
| 53         | 42648c6     | 05/10/2016 10:10        | 0.095                                            | 4.75                    | 05/10/2016 15:42                        | 6                                 | 0.127077  | 5.5190085  | 3.4160176 | 0.0026747          | 0                  | -65.08721 | $\gamma$ constrained to 0                       |
| 54         | 42648c7     | 05/10/2016 10:10        | 0.095                                            | 4.75                    | 05/10/2016 15:51                        | 6                                 | 0.0498304 | 5.4569092  | 4.1623103 | 0.0066931          | 0.8647853          | -77.33403 |                                                 |
| 55         | 42648c8     | 05/10/2016 10:10        | 0.095                                            | 4.75                    | 05/10/2016 15:59                        | 7                                 | 0.1426774 | 5.5530092  | 4.7811695 | 0.0290928          | 0.9436012          | -62.28549 |                                                 |
| 56         | 42648c9     | 05/10/2016 10:10        | 0.095                                            | 4.75                    | 05/10/2016 17:16                        | 7                                 | 0.685333  | 5.5488339  | 3.6216381 | 0.0232161          | 0.8933357          | -64.22904 |                                                 |
| 57         | 42648c10    | 05/10/2016 10:20        | 0.287                                            | 14.35                   | 05/10/2016 17:21                        | 7                                 | 0.0752155 | 5.5218236  | 3.7094126 | 0.0143319          | 0.816037           | -82.90886 |                                                 |
| 58         | 42648c11    | 05/10/2016 10:10        | 0.095                                            | 4.75                    | 05/10/2016 17:34                        | 7                                 | 0.1275492 | 5.5370548  | 4.4799293 | 0.007769           | 0.4416613          | -77.27507 |                                                 |
| 59         | 42649c1     | 05/10/2016 10:00        | 0.0316                                           | 1.58                    | 06/10/2016 09:54                        | 7                                 | 3.0463569 | 5.7346436  | 3.6835427 | 0.0430693          | 0.9819911          | -42.94078 |                                                 |
| 60         | 42649c2     | 05/10/2016 10:00        | 0.0316                                           | 1.58                    | 06/10/2016 10:04                        | 7                                 | 2.167319  | 5.6819953  | 3.7758247 | 0.0549648          | 1.1533331          | -45.03598 |                                                 |
| 61         | 42649c3     | 05/10/2016 10:10        | 0.095                                            | 4.75                    | 06/10/2016 10:16                        | 7                                 | 5.5073051 | 5.8156023  | 3.3984361 | 0.0108543          | 2                  | -55.19647 | $\gamma$ constrained to 2                       |
| 62         | 42649c4     | 05/10/2016 10:30        | 0.0105                                           | 0.525                   | 06/10/2016 10:23                        | 7                                 | 3.4713825 | 5.7326723  | 3.7957414 | 0.0509546          | 1.0542893          | -40.49814 |                                                 |
| 63         | 42649c5     | 05/10/2016 10:00        | 0.0316                                           | 1.58                    | 06/10/2016 10:34                        | 7                                 | 4.8912334 | 5.782975   | 3.5486971 | 0.0126665          | 1.2203251          | -55.7558  |                                                 |
| 64         | 42649c6     | 05/10/2016 10:00        | 0.0316                                           | 1.58                    | 06/10/2016 10:42                        | 7                                 | 3.3581531 | 5.6717818  | 3.6310889 | 0.0591647          | 1.0429893          | -39.41327 |                                                 |
| 65         | 42649c8     | 05/10/2016 10:00        | 0.0316                                           | 1.58                    | 06/10/2016 10:52                        | 7                                 | 7.2211666 | 5.7402648  | 3.3401251 | 0.0989529          | 2                  | -22.85057 | $\gamma$ constrained to 2                       |
| 66         | 42649c9     | 05/10/2016 10:00        | 0.0316                                           | 1.58                    | 06/10/2016 11:00                        | 7                                 | 3.604898  | 5.7282473  | 4.6378093 | 0.2200361          | 1.0787097          | -23.06739 |                                                 |
| 67         | 42649c10    | 05/10/2016 10:00        | 0.0316                                           | 1.58                    | 06/10/2016 11:17                        | 7                                 | 4.1896243 | 5.7408952  | 3.6840599 | 0.0506093          | 0.6821205          | -37.26667 |                                                 |
| 68         | 42649c11    | 05/10/2016 10:00        | 0.0316                                           | 1.58                    | 06/10/2016 11:27                        | 7                                 | 5.4368778 | 5.7581024  | 3.9461274 | 0.0789648          | 1.1729522          | -31.26732 |                                                 |
| 69         | 42649c12    | 05/10/2016 10:00        | 0.0316                                           | 1.58                    | 06/10/2016 12:06                        | 7                                 | 5.4243766 | 5.7682526  | 4.3500796 | 0.0956921          | 1.3411451          | -30.42931 |                                                 |
| 70         | 42649c13    | 05/10/2016 10:30        | 0.0105                                           | 0.525                   | 06/10/2016 13:32                        | 7                                 | 3.9035772 | 5.7334831  | 4.4883863 | 0.1550836          | 0                  | -19.09298 | $\gamma$ constrained to 0                       |
| 71         | 42649c14    | 05/10/2016 10:30        | 0.0105                                           | 0.525                   | 06/10/2016 13:43                        | 7                                 | 5.0656089 | 5.7217354  | 3.8404124 | 0.0505833          | 0.906082           | -37.74161 |                                                 |
| 72         | 42649c15    | 05/10/2016 10:20        | 0.287                                            | 14.35                   | 06/10/2016 13:51                        | 7                                 | 8.000332  | 5.8627686  | 3.6371743 | 0.0300895          | 0.6495523          | -39.89683 |                                                 |
| 73         | 42649c16    | 05/10/2016 10:30        | 0.0105                                           | 0.525                   | 06/10/2016 14:00                        | 7                                 | 4.1383456 | 5.751784   | 3.9078812 | 0.0178316          | 2                  | -36.59458 | $\gamma$ constrained to 2                       |
| 74         | 42649c17    | 05/10/2016 10:30        | 0.0105                                           | 0.525                   | 06/10/2016 14:09                        | 8                                 | 4.8067126 | 5.7599313  | 3.6072653 | 0.0384422          | 1.0532038          | -45.1389  |                                                 |
| 75         | 42649c18    | 05/10/2016 10:30        | 0.0105                                           | 0.525                   | 06/10/2016 14:37                        | 7                                 | 3.7405749 | 5.7697439  | 3.7021538 | 0.040181           | 1.2554103          | -42.91029 |                                                 |
| 76         | 42649c19    | 05/10/2016 10:10        | 0.095                                            | 4.75                    | 06/10/2016 14:45                        | 7                                 | 5.3887394 | 5.8163394  | 3.4811332 | 0.0352604          | 0.9555365          | -39.65335 |                                                 |
| 77         | 42649c21    | 05/10/2016 10:30        | 0.0105                                           | 0.525                   | 06/10/2016 14:55                        | 7                                 | 2.7980556 | 5.7391502  | 4.3515356 | 0.0717177          | 0.9585764          | -38.27542 |                                                 |
| 78         | 42649c22    | 05/10/2016 10:30        | 0.0105                                           | 0.525                   | 06/10/2016 15:05                        | 7                                 | 3.7037261 | 5.7448706  | 3.6718637 | 0.0405253          | 1.0830316          | -42.64583 |                                                 |
| 79         | 42649c23    | 05/10/2016 10:30        | 0.0105                                           | 0.525                   | 06/10/2016 15:50                        | 7                                 | 4.623691  | 5.747509   | 3.7686084 | 0.0338959          | 1.3955647          | -44.70636 |                                                 |
| 80         | 42649c24    | 05/10/2016 10:10        | 0.095                                            | 4.75                    | 06/10/2016 15:57                        | 7                                 | 3.2522937 | 5.739681   | 3.8786409 | 0.0123722          | 1.1647388          | -61.59934 |                                                 |
| 81         | 42649c26    | 05/10/2016 10:30        | 0.0105                                           | 0.525                   | 06/10/2016 16:07                        | 7                                 | 4.019645  | 5.7665003  | 3.992968  | 0.0062874          | 1.0484303          | -68.58782 |                                                 |
| 82         | 42649c27    | 05/10/2016 10:20        | 0.287                                            | 14.35                   | 06/10/2016 16:16                        | 8                                 | 7.4011151 | 5.7521834  | 3.6591149 | 0.230251           | 1.3853781          | -12.52269 |                                                 |
| 83         | 42650c1     | 06/10/2016 16:30        | 0.0035                                           | 0.175                   | 07/10/2016 09:19                        | 7                                 | 0.3443189 | 5.5575646  | 3.6154277 | 0.0142269          | 1.171174           | -82.12384 |                                                 |
| 84         | 42650c2     | 06/10/2016 16:45        | 0.0105                                           | 0.525                   | 07/10/2016 09:27                        | 7                                 | 0.8770038 | 5.5827066  | 3.7289328 | 0.0333533          | 0.9618248          | -58.43741 |                                                 |
| 85         | 42650c3     | 06/10/2016 16:45        | 0.0105                                           | 0.525                   | 07/10/2016 09:34                        | 7                                 | 0.9790654 | 5.5990753  | 4.0055288 | 0.0363065          | 1.11841            | -60.09791 |                                                 |
| 86         | 42650c4     | 06/10/2016 16:45        | 0.0105                                           | 0.525                   | 07/10/2016 09:41                        | 7                                 | 2.1246779 | 5.6252517  | 3.6602001 | 0.0299229          | 1.2137824          | -55.42767 |                                                 |
| 87         | 42650c5     | 06/10/2016 16:45        | 0.0105                                           | 0.525                   | 07/10/2016 09:49                        | 7                                 | 1.0385177 | 5.6097403  | 3.8817957 | 0.0182305          | 1.3016717          | -71.54162 |                                                 |
| 88         | 42650c6     | 06/10/2016 16:30        | 0.0035                                           | 0.175                   | 07/10/2016 09:57                        | 7                                 | 0.655623  | 5.5803262  | 3.7667522 | 0.0317639          | 0.7960198          | -57.84935 |                                                 |
| 89         | 42650c7     | 06/10/2016 16:30        | 0.0035                                           | 0.175                   | 07/10/2016 10:04                        | 7                                 | 0.4572032 | 5.5579525  | 3.6434244 | 0.0424089          | 1.0342112          | -61.43814 |                                                 |
| 90         | 42650c8     | 06/10/2016 16:45        | 0.0105                                           | 0.525                   | 07/10/2016 10:10                        | 7                                 | 1.6291148 | 5.6575439  | 3.6923715 | 0.0275864          | 1.4170139          | -60.4893  |                                                 |

SupplementaryTable1.xlsx

| Oocyte ID# | Oocyte Code | RNA injection date/time | RNA injection conc ( $\mu\text{g}/\mu\text{l}$ ) | RNA injection dose (ng) | Electrophysiology Experiment start time | Number of measurements per oocyte | $I_{max}$ | $pEC_{50}$ | $n_H$     | alpha ( $\alpha$ ) | gamma ( $\gamma$ ) | ELS       | Comments                  |
|------------|-------------|-------------------------|--------------------------------------------------|-------------------------|-----------------------------------------|-----------------------------------|-----------|------------|-----------|--------------------|--------------------|-----------|---------------------------|
| 91         | 42650c9     | 06/10/2016 16:45        | 0.0105                                           | 0.525                   | 07/10/2016 10:18                        | 7                                 | 1.8610461 | 5.6556993  | 3.630303  | 0.0186686          | 1.2406886          | -62.41948 |                           |
| 92         | 42650c10    | 06/10/2016 16:45        | 0.0105                                           | 0.525                   | 07/10/2016 10:24                        | 7                                 | 2.056106  | 5.6053995  | 4.0043731 | 0.0304635          | 1.4593398          | -61.0118  |                           |
| 93         | 42650c11    | 06/10/2016 16:45        | 0.0105                                           | 0.525                   | 07/10/2016 10:31                        | 7                                 | 1.002424  | 5.5759113  | 3.6667588 | 0.0329888          | 1.2802619          | -63.18639 |                           |
| 94         | 42650c12    | 06/10/2016 16:30        | 0.0035                                           | 0.175                   | 07/10/2016 10:37                        | 7                                 | 0.5738051 | 5.5746742  | 3.786813  | 0.0304138          | 1.01091            | -64.11513 |                           |
| 95         | 42650c13    | 06/10/2016 16:30        | 0.0035                                           | 0.175                   | 07/10/2016 10:44                        | 7                                 | 0.391043  | 5.5797375  | 3.8673924 | 0.0277579          | 1.1463879          | -71.68792 |                           |
| 96         | 42650c15    | 06/10/2016 16:30        | 0.0035                                           | 0.175                   | 07/10/2016 10:53                        | 7                                 | 0.5776141 | 5.5835782  | 3.7807785 | 0.036576           | 1.0157427          | -61.35302 |                           |
| 97         | 42650c16    | 06/10/2016 16:30        | 0.0035                                           | 0.175                   | 07/10/2016 12:50                        | 7                                 | 0.1563187 | 5.561691   | 4.6767275 | 0.1246865          | 1.1053248          | -61.33233 |                           |
| 98         | 42650c17    | 06/10/2016 16:30        | 0.0035                                           | 0.175                   | 07/10/2016 12:56                        | 7                                 | 0.5078711 | 5.5192087  | 3.0182521 | 0.0092764          | 0                  | -58.52394 | $\gamma$ constrained to 0 |
| 99         | 42650c18    | 06/10/2016 16:30        | 0.0035                                           | 0.175                   | 07/10/2016 13:03                        | 7                                 | 0.410184  | 5.5664063  | 3.9299608 | 0.054118           | 0.9715077          | -58.3021  |                           |
